# Supplementary material for: Smoking associates with increased BAFF and decreased interferon-γ levels in patients with systemic lupus erythematosus
Source: PubMed Central journal article supplement — Lupus Sci Med. 2021 Jan 1;8(1):e000537. doi: 10.1136/lupus-2021-000537 (PMC8562512; doi:10.1136/lupus-2021-000537), 2021-01-01
Supplement: lupus-2021-000537supp001.pdf [file lupus-2021-000537supp001.pdf]

**Supplementary Table 1: Cumulative American College of Rheumatology (1997) classification criteria for systemic lupus erythematosus at the research visit compared across smoking status.**

|                                     | Overall<br>(n=99) | Smoker<br>(n=35) | Non-smoker<br>(n=64) | OR (95%CI)               | P-value      |
|-------------------------------------|-------------------|------------------|----------------------|--------------------------|--------------|
| Mucosal-cutaneous features *        | 95 (96.0)         | 34 (97.1)        | 61 (95.3)            | 1.67 (0.17, 16.71)       | 0.662        |
| Malar Rash                          | 66 (67.3)         | <b>29 (82.9)</b> | <b>37 (58.7)</b>     | <b>3.40 (1.23, 9.34)</b> | <b>0.018</b> |
| Photosensitivity                    | 59 (60.2)         | 23 (65.7)        | 36 (57.1)            | 1.44 (0.61, 3.39)        | 0.407        |
| Discoid lupus                       | 42 (42.9)         | 18 (51.4)        | 24 (38.1)            | 1.72 (0.75, 3.97)        | 0.203        |
| Mucosal ulcers                      | 31 (31.6)         | <b>17 (48.6)</b> | <b>14 (22.2)</b>     | <b>3.31 (1.36, 8.05)</b> | <b>0.008</b> |
| Arthritis                           | 72 (73.5)         | 23 (65.7)        | 49 (77.8)            | 0.55 (0.22, 1.37)        | 0.198        |
| Serositis                           | 23 (23.5)         | 7 (20.0)         | 16 (25.4)            | 0.73 (0.27, 2.00)        | 0.547        |
| Pleuritis                           | 20 (20.4)         | 6 (17.1)         | 14 (22.2)            | 0.72 (0.25, 2.09)        | 0.551        |
| Pericarditis                        | 10 (10.2)         | 2 (5.7)          | 8 (12.7)             | 0.42 (0.08, 2.08)        | 0.286        |
| Haematological                      | 65 (66.3)         | 21 (60.0)        | 44 (69.8)            | 0.65 (0.27, 1.54)        | 0.325        |
| Leucopaenia                         | 45 (45.9)         | 15 (42.9)        | 30 (47.6)            | 0.83 (0.36, 1.90)        | 0.651        |
| Lymphopenia                         | 41 (41.8)         | 14 (40.0)        | 27 (42.9)            | 0.89 (0.38, 2.06)        | 0.784        |
| Thrombocytopenia                    | 18 (18.4)         | 4 (11.4)         | 14 (22.2)            | 0.45 (0.14, 1.50)        | 0.194        |
| Renal manifestations                | 23 (23.5)         | 6 (17.1)         | 17 (27.0)            | 0.56 (0.20, 1.58)        | 0.274        |
| Proteinuria                         | 19 (19.4)         | 4 (11.4)         | 15 (23.8)            | 0.41 (0.13, 1.36)        | 0.146        |
| Cellular casts                      | 15 (15.3)         | 5 (14.3)         | 10 (15.9)            | 0.88 (0.28, 2.83)        | 0.834        |
| Neuropsychiatric manifestations     | 6 (6.1)           | 2 (5.7)          | 4 (6.3)              | 0.89 (0.16, 5.14)        | 0.900        |
| Epilepsy                            | 4 (4.1)           | 2 (5.7)          | 2 (3.2)              | 1.85 (0.25, 13.73)       | 0.548        |
| Psychosis                           | 3 (3.1)           | 0 (0.0)          | 3 (4.8)              | -                        | -            |
| Immunological criteria              | 90 (90.9)         | 30 (85.7)        | 60 (93.8)            | 0.40 (0.10, 1.60)        | 0.195        |
| Antinuclear antibodies              | 97 (97.9)         | 35 (100.0)       | 62 (96.9)            | -                        | -            |
| Anti-double stranded DNA antibodies | 60 (61.2)         | 20 (57.1)        | 44 (69.8)            | 0.58 (0.24, 1.36)        | 0.208        |
| Anti-Smith antibodies               | 17 (17.3)         | 8 (22.9)         | 13 (20.6)            | 1.14 (0.42, 3.09)        | 0.797        |
| Anti-phospholipid antibodies        | 63 (63.6)         | 13 (37.1)        | 27 (42.9)            | 0.65 (0.28, 1.52)        | 0.582        |
| Hypocomplementemia                  | 67 (67.7)         | 24 (68.6)        | 43 (67.2)            | 1.07 (0.44, 2.58)        | 0.888        |

\*also includes alopecia

**Supplementary Table 2: Disease activity in patients with systemic lupus erythematosus at the research visit, compared across smoking status.**

|                                           | Overall          | Smokers          | Non-smokers      | OR 95%CI                  | P-value      |
|-------------------------------------------|------------------|------------------|------------------|---------------------------|--------------|
| Clinical Disease activity, n (%)          | 84 (84.8)        | 28 (28.0)        | 56 (56.5)        | 0.57 (0.19, 1.74)         | 0.324        |
| Neuropsychiatric manifestations, n (%)    | 24 (24.2)        | 12 (34.3)        | 12 (18.8)        | 2.26 (0.88, 5.78)         | 0.089        |
| Migraine, n (%)                           | <b>22 (22.2)</b> | <b>12 (12.3)</b> | <b>10 (10.6)</b> | <b>2.82 (1.07, 7.44)</b>  | <b>0.037</b> |
| Vasculitis, n (%)                         | 8 (8.1)          | 2 (2.7)          | 6 (6.4)          | 0.59 (0.11, 3.07)         | 0.527        |
| Renal disease, n (%)                      | 38 (38.4)        | 10 (10.6)        | 28 (28.8)        | 0.51 (0.21, 1.25)         | 0.140        |
| Proteinuria, n (%)                        | 25 (25.3)        | 6 (6.1)          | 19 (19.7)        | 0.49 (0.18, 1.37)         | 0.175        |
| Haematuria, n (%)                         | 15 (15.2)        | 5 (5.3)          | 10 (10.6)        | 0.90 (0.28, 2.88)         | 0.859        |
| <b>Arthritis, n (%)</b>                   | <b>21 (21.2)</b> | <b>12 (34.3)</b> | <b>9 (14.1)</b>  | <b>3.19 (1.19, 8.60)</b>  | <b>0.022</b> |
| Cutaneous manifestations, n (%)           | 59 (59.6)        | 24 (68.6)        | 35 (54.7)        | 1.81 (0.76, 4.30)         | 0.181        |
| Inflammatory rash*, n (%)                 | 38 (38.4)        | 17 (17.6)        | 21 (21.8)        | 1.93 (0.83, 4.50)         | 0.125        |
| Lupus rash, n (%)                         | 30 (30.3)        | 13 (13.1)        | 17 (17.6)        | 1.63 (0.68, 3.95)         | 0.275        |
| Alopecia, n (%)                           | 24 (24.2)        | 10 (10.6)        | 14 (14.9)        | 1.43 (0.56, 3.67)         | 0.458        |
| Ulcers, n (%)                             | 16 (16.2)        | 8 (8.9)          | 8 (8.5)          | 2.07 (0.70, 6.12)         | 0.186        |
| Serositis, n (%)                          | 1 (1.0)          | 0 (0.0)          | 1 (1.6)          | -                         | -            |
| Fever, n (%)                              | 12 (12.1)        | 4 (4.4)          | 8 (8.5)          | 0.90 (0.25, 3.24)         | 0.876        |
| Serological disease activity, n (%) **    | 61 (61.6)        | 26 (74.3)        | 57 (89.1)        | 0.52 (0.22, 1.20)         | 0.125        |
| Lympho/Leucopaenia, n (%)                 | 59 (59.6)        | 18 (51.4)        | 41 (64.1)        | 0.59 (0.26, 1.37)         | 0.222        |
| Thrombocytopenia, n (%)                   | 2 (2.0)          | 0 (0.0)          | 2 (3.1)          | -                         | -            |
| Immunological disease activity, n (%)     | 86 (86.9)        | 18 (51.4)        | 43 (67.2)        | 0.59 (0.18, 1.93)         | 0.386        |
| Antinuclear antibodies, n (%)             | 71 (71.7)        | 28 (80.0)        | 43 (67.2)        | 1.95 (0.73, 5.20)         | 0.180        |
| Anti-dsDNA antibodies, n (%)              | 31 (31.3)        | 10 (28.6)        | 21 (32.8)        | 0.82 (0.33, 2.02)         | 0.664        |
| Anti-Smith antibodies, n (%)              | 7 (7.1)          | 3 (8.6)          | 4 (6.3)          | 1.41 (0.30, 6.67)         | 0.668        |
| Hypocomplementemia, n (%)                 | 29 (29.3)        | 9 (25.7)         | 20 (31.2)        | 0.76 (0.30, 1.92)         | 0.563        |
| Antiphospholipid autoantibodies, n (%)    | 41 (41.4)        | 13 (37.1)        | 28 (43.8)        | 0.76 (0.33, 1.77)         | 0.524        |
| Secondary conditions                      |                  |                  |                  |                           |              |
| Raynaud's phenomena, n (%)                | <b>25 (25.3)</b> | <b>16 (16.7)</b> | <b>9 (9.1)</b>   | <b>5.15 (1.95, 13.56)</b> | <b>0.001</b> |
| Sjögren syndrome (Europe criteria), n (%) | 15 (15.2)        | 3 (3.6)          | 12 (12.8)        | 0.41 (0.11, 1.55)         | 0.188        |
| Anaemia, n (%)                            | 21 (21.2)        | 6 (17.1)         | 15 (23.4)        | 0.68 (0.24, 1.94)         | 0.466        |

\* also includes discoid, photosensitive, profundus, cutaneous, bullous rash.

\*\* also includes haemolytic anaemia

**Supplementary Table 3: Cumulative SLICC Damage Index items at the research visit in patients with systemic lupus erythematosus compared across smoking status.**

|                                           | <b>Overall</b> | <b>Smokers</b> | <b>Non-smokers</b> | <b>OR (95%CI)</b>  | <b>P-value</b> |
|-------------------------------------------|----------------|----------------|--------------------|--------------------|----------------|
| <b>Damage accrual, n (%)</b>              | 59 (59.6)      | 24 (68.6)      | 35 (54.7)          | 1.81 (0.76, 4.30)  | 0.181          |
| Score, median (IQR)                       | 2 (1, 3)       | 1 (1, 2)       | 2 (1, 4)           |                    | 0.325          |
| <b>Ocular, n (%)</b>                      | 6 (6.1)        | 2 (5.7)        | 4 (6.3)            | 0.91 (0.16, 5.23)  | 0.915          |
| Score, median (IQR)                       | 1 (1, 1)       | 1 (1, 1)       | 1 (1, 1)           |                    | 0.739          |
| <b>Neuropsychiatric, n (%)</b>            | 19 (19.2)      | 6 (17.1)       | 13 (20.3)          | 0.81 (0.28, 2.37)  | 0.702          |
| Score, median (IQR)                       | 1 (1, 1)       | 1 (1, 1)       | 1 (1, 1)           |                    | 0.908          |
| <b>Renal, n (%)</b>                       | 10 (10.1)      | 2 (5.7)        | 8 (12.5)           | 0.42 (0.09, 2.12)  | 0.296          |
| Score, median (IQR)                       | 1 (1, 2)       | 1 (1, 1)       | 1 (1, 2)           |                    | 0.470          |
| <b>Pulmonary, n (%)</b>                   | 7 (7.1)        | 4 (11.4)       | 3 (4.7)            | 2.62 (0.55, 12.46) | 0.225          |
| Score, median (IQR)                       | 1 (1, 1)       | 1 (1, 1)       | 1 (1, 1)           |                    | 0.400          |
| <b>Cardiovascular disease, n (%)</b>      | 18 (18.2)      | 7 (20.0)       | 11 (17.2)          | 1.21 (0.42, 3.45)  | 0.729          |
| Score, median (IQR)                       | 1 (1, 1)       | 1 (1, 1)       | 1 (1, 1)           |                    | 0.941          |
| <b>Peripheral vascular disease, n (%)</b> | 7 (7.1)        | 0 (0.0)        | 7 (10.9)           | -                  | -              |
| Score, median (IQR)                       | 1 (1, 1)       | -              | 1 (1, 1)           |                    | 0.105          |
| <b>Gastrointestinal disease, n (%)</b>    | 8 (8.1)        | 3 (8.6)        | 5 (7.8)            | 1.11 (0.25, 4.93)  | 0.895          |
| Score, median (IQR)                       | 1 (1, 1)       | 1 (1, 1)       | 1 (1, 1)           |                    | 0.800          |
| <b>Musculoskeletal, n (%)</b>             | 23 (23.2)      | 10 (28.6)      | 13 (20.3)          | 1.57 (0.61, 4.07)  | 0.354          |
| Score, median (IQR)                       | 1 (1, 1)       | 1 (1, 1)       | 1 (1, 1)           |                    | 0.496          |
| <b>Skin, n (%)</b>                        | 3 (3.0)        | 2 (5.7)        | 1 (1.6)            | 3.82 (0.33, 43.68) | 0.281          |
| Score, median (IQR)                       | 1 (1, 2)       | 1 (1, 1)       | 2 (2, 2)           |                    | 0.590          |
| <b>Gonads, n (%)</b>                      | 3 (3.0)        | 1 (2.9)        | 2 (3.1)            | 0.91 (0.08, 10.43) | 0.941          |
| Score, median (IQR)                       | 1 (1, 1)       | 1 (1, 1)       | 1 (1, 1)           |                    | 0.590          |
| <b>Endocrine, n (%)</b>                   | 1 (1.0)        | 1 (2.9)        | 0 (0.0)            | -                  | -              |
| Score, median (IQR)                       | 1 (1, 1)       | 1 (1, 1)       | -                  |                    | 0.758          |
| <b>Malignancy, n (%)</b>                  | 14 (14.1)      | 3 (8.6)        | 11 (17.2)          | 0.45 (0.12, 1.74)  | 0.249          |
| Score, median (IQR)                       | 1 (1, 1)       | 1 (1, 1)       | 1 (1, 1)           |                    | 0.382          |

#### **Supplementary Table 4: Laboratory findings of patients with systemic lupus erythematosus at the research visit, compared across smoking status**

|                                         | <b>Overall</b>           | <b>SLE smokers</b>       | <b>Non-smokers</b>       | <b>P-value</b> |
|-----------------------------------------|--------------------------|--------------------------|--------------------------|----------------|
| Haemoglobin, mean ± SD                  | <b>13.01 ± 1.50</b>      | <b>13.06 ± 1.56</b>      | <b>12.99 ± 1.49</b>      | <b>0.036</b>   |
| MCV, mean ± SD                          | <b>89.74 ± 6.28</b>      | <b>91.91 ± 6.73</b>      | <b>88.52 ± 5.70</b>      | <b>0.014</b>   |
| White blood cells, mean ± SD            | 5.83 ± 1.97              | 6.43 ± 2.19              | 5.50 ± 1.77              | 0.360          |
| Lymphocytes, mean ± SD                  | 1.36 ± 0.60              | 1.50 ± 0.65              | 1.28 ± 0.56              | 0.399          |
| Platelets, mean ± SD                    | 253.71 ± 73.85           | 270.80 ± 68.70           | 244.36 ± 75.40           | 0.346          |
| LDH, mean ± SD                          | 186.10 ± 68.08           | 178.81 ± 38.69           | 190.12 ± 79.85           | 0.123          |
| APTT, mean ± SD                         | 26.61 ± 3.50             | 26.14 ± 3.22             | 26.89 ± 3.66             | 0.307          |
| Iron, mean ± SD                         | 13.98 ± 6.47             | 13.40 ± 6.26             | 14.31 ± 6.61             | 0.642          |
| TIBC, mean ± SD                         | 60.26 ± 10.92            | 58.54 ± 8.55             | 61.23 ± 12.01            | 0.298          |
| Transferrin, mean ± SD                  | 2.43 ± 0.40              | 2.33 ± 0.34              | 2.48 ± 0.42              | 0.113          |
| Triglycerides, mean ± SD                | 1.18 ± 0.58              | 1.10 ± 0.48              | 1.23 ± 0.63              | 0.992          |
| Cholesterol, mean ± SD                  | 4.71 ± 1.06              | 4.58 ± 0.83              | 4.79 ± 1.18              | 0.913          |
| High Density Lipoprotein, mean ± SD     | 1.62 ± 0.55              | 1.58 ± 0.52              | 1.65 ± 0.57              | 0.670          |
| LDL cholesterol, mean ± SD              | 2.88 ± 0.91              | 2.84 ± 0.80              | 2.90 ± 0.98              | 0.670          |
| Ionised calcium, median (IQR)           | 1.23 (1.20, 1.25)        | 1.23 (1.20, 1.24)        | 1.23 (1.20, 1.25)        | 0.759          |
| Albumin, mean ± SD                      | 42.33 ± 3.94             | 43.06 ± 3.56             | 41.93 ± 4.11             | 0.927          |
| Potassium, mean ± SD                    | 3.89 ± 0.31              | 3.94 ± 0.31              | 3.86 ± 0.31              | 0.742          |
| Creatinine, mean ± SD                   | 66.48 ± 34.52            | 66.14 ± 29.62            | 66.67 ± 37.19            | 0.673          |
| HbA1c (%), median (IQR)                 | 5.70 (5.30, 5.95)        | 5.70 (5.40, 6.00)        | 5.70 (5.20, 5.80)        | 0.801          |
| Fasting glucose, mean ± SD              | 5.09 ± 0.88              | 5.15 ± 1.21              | 5.06 ± 0.63              | 0.855          |
| ASAT, mean ± SD                         | 28.84 ± 20.96            | 23.43 ± 8.77             | 31.80 ± 24.83            | 0.113          |
| ALAT, mean ± SD                         | 27.20 ± 31.71            | 20.37 ± 13.54            | 30.94 ± 37.75            | 0.235          |
| Alkaline phosphatase ALP, mean ± SD     | 66.33 ± 31.38            | 60.57 ± 15.47            | 69.48 ± 37.07            | 0.729          |
| Gamma GT, mean ± SD                     | 29.51 ± 29.91            | 23.66 ± 13.68            | 32.76 ± 35.59            | 0.399          |
| Homocysteine, median (IQR)              | 10.00 (8.00, 13.00)      | 11.00 (9.00, 13.00)      | 10.00 (7.00, 12.00)      | 0.320          |
| Haptoglobin, median (IQR)               | 1.40 (0.90, 1.90)        | 1.70 (1.10, 2.10)        | 1.30 (0.80, 1.80)        | 0.060          |
| Ceruloplasmin, median (IQR)             | 0.32 (0.29, 0.38)        | 0.32 (0.29, 0.35)        | 0.34 (0.29, 0.39)        | 0.436          |
| C1 esterase inhibitor, median (IQR)     | 0.33 (0.30, 0.38)        | 0.34 (0.31, 0.38)        | 0.33 (0.28, 0.38)        | 0.809          |
| Fibrinogen, mean ± SD                   | 3.59 ± 0.68              | 3.68 ± 0.64              | 3.54 ± 0.71              | 1.000          |
| ESR in mm/hr, median (IQR)              | 20.00 (10.00, 34.00)     | 22.00 (10.00, 34.00)     | 19.00 (11.00, 33.50)     | 0.621          |
| CRP sensitive, median (IQR)             | 2.10 (0.64, 5.00)        | 1.31 (0.67, 4.13)        | 3.00 (0.60, 5.10)        | 0.138          |
| C3, mean ± SD                           | 0.96 ± 0.27              | 0.94 ± 0.19              | 0.97 ± 0.31              | 0.299          |
| C4, mean ± SD                           | 0.16 ± 0.06              | 0.17 ± 0.06              | 0.16 ± 0.07              | 0.689          |
| B cells, median (IQR)                   | <b>0.10 (0.04, 0.22)</b> | <b>0.14 (0.07, 0.28)</b> | <b>0.08 (0.04, 0.19)</b> | <b>0.037</b>   |
| Immunoglobulin A, median (IQR)          | 2.38 (1.45, 2.96)        | 2.30 (1.34, 2.96)        | 2.42 (1.55, 2.96)        | 0.876          |
| Immunoglobulin G, median (IQR)          | 13.25 (10.90, 16.30)     | 12.95 (10.70, 16.05)     | 13.45 (10.90, 16.30)     | 0.820          |
| Immunoglobulin M, median (IQR)          | 0.94 (0.73, 1.38)        | 0.89 (0.55, 1.17)        | 0.98 (0.77, 1.48)        | 0.495          |
| Rheumatoid factor (Latex), mean (95%CI) | 22.81 (18.83, 27.63)     | 21.81 (17.16, 27.72)     | 23.67 (17.49, 32.02)     | 0.674          |

**Supplementary Table 5: Medication requirement of patients with systemic lupus erythematosus at the research visit, compared across smoking status**

|                                    | Overall          | Smokers          | Non-smokers    | OR 95%CI                  | P-value      |
|------------------------------------|------------------|------------------|----------------|---------------------------|--------------|
| <b>Prednisone, n (%)</b>           | 50 (50.5)        | 18 (51.4)        | 32 (50.0)      | 1.06 (0.46, 2.41)         | 0.892        |
| <b>Hydroxychloroquine, n (%)</b>   | 58 (58.6)        | 19 (54.3)        | 39 (60.9)      | 0.76 (0.33, 1.75)         | 0.521        |
| <b>Rituximab, n (%)</b>            | 1 (1.0)          | 1 (2.9)          | 0 (0.0)        | -                         | -            |
| <b>Any cytostatic agent, n (%)</b> | 36 (36.4)        | 13 (37.1)        | 23 (35.9)      | 1.05 (0.45, 2.48)         | 0.905        |
| <b>Methotrexate, n (%)</b>         | 4 (4.0)          | 2 (5.7)          | 2 (3.1)        | 1.88 (0.25, 13.95)        | 0.538        |
| <b>Azathioprine, n (%)</b>         | 21 (21.2)        | 6 (17.1)         | 15 (23.4)      | 0.68 (0.24, 1.94)         | 0.466        |
| <b>Cyclophosphamide, n (%)</b>     | 1 (1.0)          | 0 (0.0)          | 1 (1.6)        |                           |              |
| <b>Mycophenolate, n (%)</b>        | 11 (11.1)        | 5 (14.3)         | 6 (9.4)        | 1.61 (0.45, 5.71)         | 0.460        |
| <b>NSAIDs, n (%)</b>               | <b>15 (15.2)</b> | <b>11 (31.4)</b> | <b>4 (6.3)</b> | <b>6.88 (1.99, 23.72)</b> | <b>0.002</b> |
| <b>Aspirin, n (%)</b>              | 32 (32.3)        | 10 (28.6)        | 22 (34.4)      | 0.76 (0.31, 1.87)         | 0.556        |
| <b>Warfarin/LWMH, n (%)</b>        | 10 (10.1)        | 2 (5.7)          | 8 (12.5)       | 0.42 (0.09, 2.12)         | 0.296        |
| <b>Statins, n (%)</b>              | 13 (13.1)        | 6 (17.1)         | 7 (10.9)       | 1.69 (0.52, 5.48)         | 0.386        |
| <b>Anti-hypertensives, n (%)</b>   | 36 (36.4)        | 10 (28.6)        | 26 (40.6)      | 0.59 (0.24, 1.42)         | 0.236        |
| <b>Anti-osteoporotic, n (%)</b>    | 14 (14.1)        | 4 (11.4)         | 10 (15.6)      | 0.70 (0.20, 2.41)         | 0.568        |
| <b>Anti-depressives, n (%)</b>     | 3 (3.0)          | 1 (2.9)          | 2 (3.1)        | 0.91 (0.08, 10.43)        | 0.941        |
